# Supplementary material
Source: Elsevier journal article supplement (https://www.sciencedirect.com/science/article/pii/S2013251421000699)
Supplement: mmc1 [file S2013251421000699:mmc1.docx]

**SUPPLEMENTARY MATERIAL**

***Table 1:*** *Percentage and in absolute values (in parentheses) of the different degrees of aortic valve calcification at the baseline visit and at 24 months.*

|  | **Baseline visit%** | **24 month visit %** |
| --- | --- | --- |
| **Mild** | 24.2  (96 ) | 34.9  (139 ) |
| **Moderate** | 5.8  (2. 3) | 6.8  (27) |
| **Severe** | 0.3 -  (1) | 1.3  (5) |
| **No calcium** | 63.6  (252 ) | 49.2  (195 ) |
| **Missing values** | 6.1  (25) | 7.8  (31) |

***Table 2:****Results of the univariate analysis.  Presence of aortic calcification as the dependent variable.*

|  | **OR** | **95% CI** | **P value** |
| --- | --- | --- | --- |
| **Total calcium (mg / dL )**  *** not corrected** | 1.18 | 0.8-1.74 | 0.4 |
| **iPTH (pg / mL )** | 1 | 1.00-1.00 | 0.8 |
| **CRP (mg / dl)** | 0.983 | 0.952-1.015 | 0.289 |
| **P (mg / dL )** | 1.64 | 1.16-2.42 | **0.00 7** |
| **Albumin (g / dL )** | 0.978 | 0.653-1.466 | 0.916 |
| **Total plaque area** | 1.23 | 0.8-1.95 | 0.4 |
| **Carotid plaque total area** | 3.83 | 1.41-11.67 | **0.01** |
| **Femoral plaque total area** | 1.05 | 0.65-1.70 | 0.9 |
| **Total mean IMT** | 9.55 | 2.10-45.52 | **0.004** |
| **Gender (female)** | 0.73 | 0.45-1.12 | 0.2 |
| **Age** | 1.05 | 1.03-1.08 | **<0.001** |
| **LDL-cholesterol (mg / dl)** | 1.00 | 0.99-1.01 | 0.7 |
| **CT (mg / dL )** | 1.00 | 1.00-1.01 | 0.8 |
| **DM** | 0.60 | 0.38-0.94 | **0.03** |
| **ABI** | 2.36 | 0.94-6.53 | 0.08 |
| **BMI** | 1.03 | 0.99-1.08 | 0.13 |
| **Ca x P** | 1.02 | 1.00-1.04 | 0.05 |
| **PP ( mmHg )** | 1.02 | 1.00-1.03 | **0.009** |
| **eGFR ( mL / min)** | 0.99 | 0.98-1.00 | 0.2 |
| **Calcium-based P binders** | 0.81 | 0.44-1.50 | 0.5 |
| **Vitamin D and analogs** | 1.11 | 0.72, 1.72 | 0.6 |

***Figure 1 :****Logistic regression analysis of the relationship between LV growth pattern and aortic calcification.*

***Table 3:****Representation in percentage and in absolute numbers (number in parentheses) of the different degrees of mitral valve calcification at the baseline visit and at 24 months .*

|  | **Baseline visit%** | **24 month visit %** |
| --- | --- | --- |
| **Mild** | 20.2  (80) | 26.2  (104) |
| **Moderate** | 3  (12) | 3.5  (14) |
| **Severe** | 1  (4) | 1  (4) |
| **No calcium** | 72.5  (287) | 61.6  (244) |
| **Missing values** | 3.3  (14) | 7.7  (31) |

***Table 4:*** *Percentage and in absolute numbers (in parentheses) of the different types of mitral valve calcification at the baseline visit and at 24 months.*

|  | **Baseline visit%** | **24 months visit %** |
| --- | --- | --- |
| **Ring** | 9.3  (37) | 12.1  (48) |
| **Veil** | 9.6  (38) | 10.8  (43) |
| **Subvalvular apparatus** | 0.3  (1) | 0.5  (2) |
| **Ring,veils and subvalvular** | 3.5  (14) | 4.5  (18) |
| **Missing values** | 77.3  (307) | 72  (286) |

***Table 5:****Results of the univariate analysis taking the presence of mitral calcification as the dependent variable.*

|  | **OR** | **95% CI** | **P value** |
| --- | --- | --- | --- |
| **Total calcium (mg / dL )**  *** not corrected** | 1.32 | 0.87-2.00 | 0.2 |
| **CRP (mg / dl)** | 1 | 0.974-1.026 | 0.986 |
| **P (mg / dL )** | 0.882 | 0.549-1.416 | 0.602 |
| **Albumin (g / dL )** | 1,123 | 0.732-1.721 | 0.596 |
| **iPTH (pg / mL )** | 1 | 0.99-1.00 | 0.1 |
| **Total plaque area** | 1.27 | 0.83-1.96 | 0.261 |
| **Carotid plaque total area** | 3.06 | 1.25-8.22 | 0.02 |
| **Femoral plaque total area** | 1.17 | 0.72-1.90 | 0.519 |
| **Total mean IMT** | 4.10 | 0.85-20.05 | 0.079 |
| **Gender (female)** | 1.01 | 0.64-1.57 | 1 |
| **Age** | 1.05 | 1.02-1.07 | **<0.001** |
| **LDL-cholesterol (mg / dL )** | 1.01 | 1.00-1.01 | 0.179 |
| **CT (mg / dL )** | 1.00 | 1.00-1.01 | 0.46 |
| **DM** | 0.84 | 0.52-1.36 | 0.5 |
| **ABI** | 3.38 | 1.32-9.45 | **0.01** |
| - **ABI ≤0.9** | 0.44 | 0.03-6.44 | 0.55 |
| -**ABI≥1.4** | 63.30 | 3.47-4833.61 | **0.02** |
| **BMI** | 1.05 | 1.00-1.09 | **0.035** |
| **Ca x P** | 1.02 | 1.00-1.04 | **0.04** |
| **PP ( mmHg )** | 1.02 | 1.00-1.03 | **0.01** |
| **eGFR ( mL / min)** | 1 | 0.98-1.01 | 0.79 |
| **Calcium-based P binders** | 0.72 | 0.38-1.36 | 0.3 |
| **Vitamin D and analogs** | 0.86 | 0.54- 1.36 | 0.5 |
